# Supplementary material for: Serum MMP-8 and TIMP-1 predict prognosis in colorectal cancer
Source: Springer Nature journal article supplement (doi:10.1186/s12885-018-4589-x), 2018-06-21
Supplement: MOESM1 [file 15867458]

**Additional file 1.** Significance of the difference in MMP-8/TIMP-1 and MMP-9/TIMP-1 molar ratios in 330 colorectal cancer patients.

| Clinicopathological variable      | MMP-8/TIMP-1        |                 | MMP-9/TIMP-1        |                 |
|-----------------------------------|---------------------|-----------------|---------------------|-----------------|
|                                   | Median (IQR)        | <i>P</i> -value | Median (IQR)        | <i>P</i> -value |
| Age <sup>1</sup>                  |                     |                 |                     |                 |
| <=65                              | 0.189 (0.099-0.320) | 0.179           | 0.429 (0.260-0.625) | 0.002           |
| >65                               | 0.153 (0.089-0.315) |                 | 0.332 (0.210-0.475) |                 |
| Gender <sup>1</sup>               |                     |                 |                     |                 |
| Male                              | 0.157 (0.092-0.306) | 0.530           | 0.389 (0.240-0.573) | 0.170           |
| Female                            | 0.172 (0.097-0.321) |                 | 0.356 (0.193-0.517) |                 |
| Dukes classification <sup>2</sup> |                     |                 |                     |                 |
| A                                 | 0.142 (0.093-0.261) | 0.001           | 0.349 (0.229-0.609) | 0.675           |
| B                                 | 0.154 (0.085-0.255) |                 | 0.408 (0.251-0.550) |                 |
| C                                 | 0.151 (0.093-0.276) |                 | 0.357 (0.216-0.498) |                 |
| D                                 | 0.305 (0.142-0.659) |                 | 0.366 (0.188-0.597) |                 |
| pT <sup>2</sup>                   |                     |                 |                     |                 |
| pT1                               | 0.145 (0.067-0.167) | 0.169           | 0.349 (0.165-0.815) | 0.612           |
| pT2                               | 0.136 (0.091-0.281) |                 | 0.334 (0.223-0.533) |                 |
| pT3                               | 0.173 (0.097-0.330) |                 | 0.383 (0.228-0.552) |                 |
| pT4                               | 0.199 (0.133-0.366) |                 | 0.396 (0.261-0.500) |                 |
| pN <sup>2</sup>                   |                     |                 |                     |                 |
| pN0                               | 0.156 (0.093-0.273) | 0.379           | 0.380 (0.232-0.563) | 0.583           |
| pN1                               | 0.180 (0.096-0.384) |                 | 0.349 (0.219-0.478) |                 |
| pN2                               | 0.179 (0.101-0.352) |                 |                     |                 |
| pM <sup>1</sup>                   |                     |                 |                     |                 |
| pM0                               | 0.152 (0.093-0.272) | <0.001          | 0.370 (0.230-0.527) | 0.821           |
| pM1                               | 0.300 (0.143-0.646) |                 | 0.379 (0.184-0.617) |                 |
| Grade (WHO) <sup>2</sup>          |                     |                 |                     |                 |
| 1                                 | 0.164 (0.082-0.442) | 0.174           | 0.356 (0.256-0.503) | 0.604           |
| 2                                 | 0.159 (0.093-0.313) |                 | 0.368 (0.212-0.569) |                 |
| 3                                 | 0.101 (0.069-0.200) |                 | 0.294 (0.231-0.481) |                 |
| 4                                 | 0.201 (0.117-0.411) |                 | 0.449 (0.315-0.603) |                 |
| Location <sup>1</sup>             |                     |                 |                     |                 |
| Colon                             | 0.176 (0.101-0.322) | 0.127           | 0.389 (0.253-0.539) | 0.313           |
| Rectum                            | 0.155 (0.092-0.300) |                 | 0.344 (0.192-0.567) |                 |
| Side <sup>1</sup>                 |                     |                 |                     |                 |
| Right                             | 0.189 (0.104-0.330) | 0.109           | 0.370 (0.252-0.524) | 0.882           |
| Left                              | 0.154 (0.092-0.302) |                 | 0.379 (0.210-0.563) |                 |
| Histologic type <sup>1</sup>      |                     |                 |                     |                 |
| Adeno                             | 0.162 (0.093-0.317) | 0.748           | 0.369 (0.217-0.555) | 0.427           |
| Mucinous                          | 0.158 (0.121-0.352) |                 | 0.435 (0.298-0.508) |                 |

**Additional file 1.** Significance of the difference in MMP-8/TIMP-1 and MMP-9/TIMP-1 molar ratios in 330 colorectal cancer patients.

---

Abbreviations: MMP = matrix metalloproteinase, TIMP-1 = tissue inhibitor of matrix metalloproteinase-1, IQR = interquartile range

<sup>1</sup>Mann-Whitney U test, <sup>2</sup>Kruskal-Wallis test
