# Supplementary material for: Serum MMP-8 and TIMP-1 predict prognosis in colorectal cancer
Source: Springer Nature journal article supplement (doi:10.1186/s12885-018-4589-x), 2018-06-21
Supplement: MOESM2 [file 15867458]

**Additional file 2.** 5-year disease-specific survival with 95% confidence intervals for MMP-8, -9, and TIMP-1 in colorectal cancer patients

---

| <b>Biomarker concentration</b> | <b>Low</b>       | <b>High</b>      |
|--------------------------------|------------------|------------------|
| MMP-8                          | 76.0 (69.1-82.9) | 62.7 (54.7-70.7) |
| MMP-9                          | 67.8 (60.0-75.6) | 71.0 (63.7-78.3) |
| TIMP-1                         | 76.4 (69.7-83.1) | 62.6 (54.6-70.6) |
| MMP-8/TIMP-1 ratio             | 76.4 (69.3-83.5) | 63.2 (55.4-71.0) |
| MMP-9/TIMP-1 ratio             | 63.2 (55.0-71.4) | 75.1 (68.2-82.0) |

---

Abbreviations: MMP = matrix metalloproteinase, TIMP-1 = tissue inhibitor of metalloproteinases-1, CI = confidence interval

<sup>1</sup>Log-rank test
