# Supplementary material for: Serum MMP-8 and TIMP-1 predict prognosis in colorectal cancer
Source: Springer Nature journal article supplement (doi:10.1186/s12885-018-4589-x), 2018-06-21
Supplement: MOESM3 [file 15867458]

**Additional file 3.** Univariable Cox regression analyses for subgroups for disease-specific survival in colorectal cancer patients.

|           | High MMP-8 |           |         | High MMP-9 |           |         | High TIMP-1 |           |         |
|-----------|------------|-----------|---------|------------|-----------|---------|-------------|-----------|---------|
|           | HR         | 95% CI    | P-value | HR         | 95% CI    | P-value | HR          | 95% CI    | P-value |
| Location  |            |           |         |            |           |         |             |           |         |
| Colon     | 2.00       | 1.10-3.64 | 0.023   | 1.84       | 1.00-3.38 | 0.050   | 1.78        | 0.99-3.19 | 0.052   |
| Rectum    | 1.62       | 0.97-2.70 | 0.065   | 0.49       | 0.28-0.85 | 0.011   | 1.95        | 1.17-3.26 | 0.011   |
| Side      |            |           |         |            |           |         |             |           |         |
| Right     | 1.92       | 0.79-4.62 | 0.148   | 1.67       | 0.72-3.91 | 0.235   | 1.83        | 0.78-4.28 | 0.166   |
| Left      | 1.80       | 1.17-2.77 | 0.007   | 0.76       | 0.49-1.16 | 0.203   | 1.95        | 1.27-3.00 | 0.002   |
| CRP level |            |           |         |            |           |         |             |           |         |
| <30       | 1.66       | 1.10-2.53 | 0.017   | 0.79       | 0.52-1.20 | 0.267   | 1.59        | 1.05-2.42 | 0.029   |
| >=30      | 1.60       | 0.58-4.44 | 0.369   | 1.77       | 0.72-4.37 | 0.216   | 2.92        | 0.96-8.82 | 0.058   |

Abbreviations: MMP = matrix metalloproteinase, TIMP-1 = tissue inhibitor of matrix metalloproteinases, CRP = C-reactive protein, HR = hazard ratio, CI = confidence interval
